# Supplementary material for: Differential mRNA Expression Levels of Human Histone-Modifying Enzymes in Normal Karyotype B Cell Pediatric Acute Lymphoblastic Leukemia
Source: PubMed Central journal article supplement (PMC3588049; doi:10.3390/ijms14023376), 2013-02-06
Supplement: ijms-14-03376-s003.pdf [file ijms-14-03376-s003.pdf]

Analysis Name: genes for IPA - 2013-01-05 12:52

Analysis Creation Date: 2013-01-05

Build version: 192063

Content version: 14400082 (Release Date: 2012-11-01)

## Analysis settings

[View](#)

Reference set: Ingenuity Knowledge Base (Genes Only)

Relationship to include: Direct and Indirect

Includes Endogenous Chemicals

Optional Analyses: My Pathways My List

Filter Summary:

Consider only molecules and/or relationships where

(species = Uncategorized OR Human) AND

(confidence = Experimentally Observed) AND

(tissues/cell lines = Cytotoxic T cells OR Activated CD56bright NK cells OR Salivary Gland OR Immature monocyte-derived dendritic cells OR Lung OR Central memory cytotoxic T cells OR Large Intestine OR K-562 OR MOLT-4 OR CD56bright NK cells OR Macrophages OR BDCA-1+ dendritic cells OR Kidney OR Prostate Gland OR Testis OR SR OR Effector memory cytotoxic T cells OR Bladder OR Activated Vd2 Gamma-delta T cells OR Mammary Gland OR Naive B cells OR CCRF-CEM OR Activated Vd1 Gamma-delta T cells OR Central memory helper T cells OR Skeletal Muscle OR Liver OR Epidermis OR Ovary OR Naive helper T cells OR Jurkat OR RAW 264.7 OR Activated helper T cells OR Heart OR Small Intestine OR BDCA-3+ dendritic cells OR Thymus OR Uterus OR Murine NKT cells OR Plasmacytoid dendritic cells OR Other Tissues and Primary Cells OR Stomach OR Memory B cells OR Monocytes OR Retina OR Vd2 Gamma-delta T cells OR Effector memory helper T cells OR Mature monocyte-derived dendritic cells OR Neutrophils OR Effector memory RA+ cytotoxic T cells OR Pancreas OR Th2 cells OR Spleen

OR Adipose OR HL-60 OR Activated CD56dim NK cells OR Placenta OR Vd1 Gamma-delta T cells OR THP-1 OR Natural T-regulatory cells OR Th1 cells OR Monocyte-derived macrophage OR Effector T cells OR CD56dim NK cells) AND  
(data sources = BIND OR BIOGRID OR Cognition OR DIP OR Ingenuity Expert Findings OR Ingenuity ExpertAssist Findings OR INTACT OR Interactome studies OR MINT OR MIPS OR TarBase)

## Top Networks

| ID | Associated Network Functions                                                                   | Score |
|----|------------------------------------------------------------------------------------------------|-------|
| 1  | Gene Expression, Organ Morphology, Skeletal and Muscular System Development and Function       | 35    |
| 2  | DNA Replication, Recombination, and Repair, Gene Expression, Cellular Function and Maintenance | 10    |

## Top Bio Functions

### Diseases and Disorders

| Name                   | p-value             | # Molecules |
|------------------------|---------------------|-------------|
| Cancer                 | 5.42E-06 - 4.58E-02 | 12          |
| Hematological Disease  | 5.42E-06 - 1.93E-02 | 8           |
| Immunological Disease  | 8.31E-05 - 1.04E-02 | 6           |
| Developmental Disorder | 1.15E-03 - 4.33E-02 | 5           |
| Hereditary Disorder    | 1.15E-03 - 2.82E-02 | 5           |

### Molecular and Cellular Functions

| Name                              | p-value             | # Molecules |
|-----------------------------------|---------------------|-------------|
| Gene Expression                   | 5.46E-09 - 2.06E-02 | 13          |
| Cell Cycle                        | 2.79E-06 - 2.57E-02 | 5           |
| Cellular Development              | 2.09E-05 - 4.08E-02 | 7           |
| Cellular Growth and Proliferation | 2.09E-05 - 4.08E-02 | 7           |
| Cell Death and Survival           | 1.70E-04 - 3.64E-02 | 8           |

### Physiological System Development and Function

| Name                                           | p-value             | # Molecules |
|------------------------------------------------|---------------------|-------------|
| Cardiovascular System Development and Function | 2.38E-05 - 5.19E-03 | 2           |
| Embryonic Development                          | 2.38E-05 - 2.95E-02 | 4           |
| Organ Development                              | 2.38E-05 - 5.19E-03 | 3           |
| Organismal Development                         | 2.38E-05 - 5.19E-03 | 3           |
| Tissue Development                             | 2.38E-05 - 1.16E-02 | 5           |

## Top Canonical Pathways

| Name                                                     | p-value  | Ratio         |
|----------------------------------------------------------|----------|---------------|
| Phospholipase C Signaling                                | 1.79E-04 | 4/256 (0.016) |
| HMGB1 Signaling                                          | 2.22E-04 | 3/99 (0.03)   |
| DNA Methylation and Transcriptional Repression Signaling | 2.99E-04 | 2/23 (0.087)  |
| Hereditary Breast Cancer Signaling                       | 3.84E-04 | 3/123 (0.024) |
| Notch Signaling                                          | 1.03E-03 | 2/41 (0.049)  |

## Top Molecules

### Fold Change up-regulated

| Molecules | Exp. Value | Exp. Chart |
|-----------|------------|------------|
| CSRP2BP   | 1.000      |            |
| EHMT2     | 1.000      |            |
| HDAC2     | 1.000      |            |
| KAT7      | 1.000      |            |
| KAT2A     | 1.000      |            |
| KAT6B     | 1.000      |            |
| PAK1      | 1.000      |            |
| RNF20     | 1.000      |            |
| SETD2     | 1.000      |            |
| SUV420H1  | 1.000      |            |

### Fold Change down-regulated

| Molecules | Exp. Value | Exp. Chart |
|-----------|------------|------------|
| RPS6KA3   | -1.000     |            |
| PRMT2     | -1.000     |            |
| NOTCH2    | -1.000     |            |

|        |        |
|--------|--------|
| NOTCH1 | -1.000 |
| HDAC5  | -1.000 |
| EP300  | -1.000 |
| DNMT3A | -1.000 |

### Top Upstream Regulators

| Upstream Regulator                           | p-value of overlap | Predicted Activation State |
|----------------------------------------------|--------------------|----------------------------|
| curcumin                                     | 2.83E-06           |                            |
| mir-34                                       | 2.45E-05           |                            |
| miR-34a-5p (and other miRNAs w/seed GGCAGUG) | 1.33E-04           |                            |
| POFUT1                                       | 9.63E-04           |                            |
| PCNA                                         | 9.63E-04           |                            |

## Top My Lists

| Name | p-value | Ratio |
|------|---------|-------|
|------|---------|-------|

## Top My Pathways

| Name                                    | p-value  | Ratio          |
|-----------------------------------------|----------|----------------|
| Merged networks                         | 6.93E-02 | 4/1404 (0.003) |
| FASN malignancy pathway                 | 1.1E-01  | 1/142 (0.007)  |
| NRF2-mediated Oxidative Stress Response | 2.05E-01 | 1/194 (0.005)  |

## Top Tox Lists

| Name                                   | p-value  | Ratio         |
|----------------------------------------|----------|---------------|
| Cell Cycle: G1/S Checkpoint Regulation | 2.7E-03  | 2/60 (0.033)  |
| Cardiac Hypertrophy                    | 8.11E-03 | 3/326 (0.009) |
| RAR Activation                         | 2.04E-02 | 2/171 (0.012) |
| NF-κB Signaling                        | 2.08E-02 | 2/173 (0.012) |
| Increases Cardiac Dilation             | 3.45E-02 | 1/27 (0.037)  |

**Top Tox Functions****Cardiotoxicity**

| Name                                | p-value             | # Molecules |
|-------------------------------------|---------------------|-------------|
| <a href="#">Cardiac Hypertrophy</a> | 2.27E-03 - 4.33E-02 | 2           |
| <a href="#">Heart Failure</a>       | 1.55E-01 - 1.55E-01 | 1           |

**Hepatotoxicity**

| Name                                                 | p-value             | # Molecules |
|------------------------------------------------------|---------------------|-------------|
| <a href="#">Liver Cirrhosis</a>                      | 5.46E-03 - 5.46E-03 | 2           |
| <a href="#">Hepatocellular Carcinoma</a>             | 4.97E-01 - 4.97E-01 | 1           |
| <a href="#">Liver Hyperplasia/Hyperproliferation</a> | 4.97E-01 - 4.97E-01 | 1           |

**Nephrotoxicity**

| Name                                      | p-value             | # Molecules |
|-------------------------------------------|---------------------|-------------|
| <a href="#">Renal Necrosis/Cell Death</a> | 3.64E-02 - 6.79E-02 | 2           |
