# Supplementary material for: Differential mRNA Expression Levels of Human Histone-Modifying Enzymes in Normal Karyotype B Cell Pediatric Acute Lymphoblastic Leukemia
Source: Int J Mol Sci. 2013 Feb 6;14(2):3376–94. doi: 10.3390/ijms14023376 (PMC3588049; doi:10.3390/ijms14023376)
Supplement: Supplementary File 1 — Supplemental Table (XLS, 34 KB) [file ijms-14-03376-s001.xls]

## Sheet: Sheet1
	Primer	Sequence
1	HTATIP-F	CTTGGCCAAAAGACACAGGT
2	HTATIP-R	CATCCTCCAGGCAATGAGAT
3	GCN5L2-F	CGGCGTAGGTGAGGAAGTAG
4	GCN5L2-R	GTGCTGTCACCTCGAATGAG
5	NCOA1-F	TGATGTTTTCCAGAGATGGCT
6	NCOA1-R	TCTGAGGGGCTTAGAAATTAACA
7	NCOA3-F	CAGTCAAAGGATGTTCAAGCA
8	NCOA3-R	CCGATTTAAAGCTGAGCTGC
9	NCOA6-F	AGTCGCAGTCCTGCTTGTTT
10	NCOA6-R	CGATCTTCTCGACCTGCTTC
11	CARM1-F	CCAGGGTGATGATGAAGGAC
12	CARM1-R	GGGCATCGCCCTCTACA
13	DNMT1-F	TTCTGTTAAGCTGTCTCTTTCCA
14	DNMT1-R	TGCTGAAGCCTCCGAGAT
15	DNMT3A-F	ATTCCTTCTCACAACCCGC
16	DNMT3A-R	TACTTCCAGAGCTTCAGGGC
17	DNMT3B-F	TCTCCATTGAGATGCCTGGT
18	DNMT3B-R	GAGATTCGCGAGCCCAG
19	ATF2-F	GCAGTCCTTTCTCAAGTTTCC
20	ATF2-R	GGTGCTTTGTAAACACGGCT
21	CDYL-F	CTCGCTGTCATAGCCTTTCC
22	CDYL-R	AGCAGCCTCCCGCTTTAC
23	CSRP2BP-F	TCTGGTGTCGAAATCCCTTC
24	CSRP2BP-R	CTGGACAAGCCACGTACAGA
25	ESCO1-F	CTGCCATCAGGGTATTCAGC
26	ESCO1-R	CAGCATCTGCTTTTCCACAA
27	HAT1-F	CATCCCCAAAGAGTTGATGG
28	HAT1-R	AACACCAACACAGCAATTGAA
29	PCAF-F	GGTGAGGGGTTAGGGTTTTT
30	PCAF-R	GGCCAAGAAACTGGAGAAACT
31	DOT1L-F	TCGATGATTTCATGAGCAGC
32	DOT1L-R	AGAAGCTGGAGCTGAGACTGA
33	MLL-F	TGAAGGAGACCTTGTGGGAC
34	MLL-R	CCGTGTTTGGGGAGAGC
35	MLL3-F	TCCCGCTCAGGACTAGATTC
36	MLL3-R	CAGAGCATTCAAGGGATGGT
37	SETDB2-F	TCAAGAGAGAGAATTTCCTTATTTCC
38	SETDB2-R	TCCAATGCATTTCCCTCTACA
39	SMYD3-F	TAGGCCAACACCAACTTCCT
40	SMTD3-R	CCTGCCTTTGACCTTTTTGA
41	SUV39H1-F	CTGACGGTCGTAGATCTGGC
42	SUV39H1-R	ATTCGCAAGAACAGCTTCGT
43	ASH1L-F	CCAAAACTCGAAACCAGCAT
44	ASH1l-R	ACCCCCTCTTCCCCACTT
45	MLL5-F	CAAACCCATGAGATGTCTGGTA
46	MLL5-R	GTTCGGGTGTCTCGTGTGT
47	NSD1-F	CATGGGCGTCTCTTGAATTT
48	NSD1-R	ATCTACTTCACAGGAATTGCCA
49	SUV420H1-F	TTGAGCTCCTCGAAGGAAAG
50	SUV420H1-R	ATGACCTAGCAACCAGTTTGG
51	WHSC1-F	ACTGGCGTGCACTCTTTTTC
52	WHSC1-R	GGTCCAAAGTGTCGGGTTAC
53	NEK6-F	TGTCCTGCCATCCTGCAT
54	NEK6-R	AAACTCGTGTGGGAGGCAC
55	PAK1-F	TGGGGGTTTGTCTTGAATGT
56	PAK1-R	AGGAGGAGCCGAGAGGAG
57	RPS6KA3-F	TGGGTTAATCTCCTCCTCTCC
58	RPS6KA3-R	GTGGCAGAAGATGGCTGTG
59	RPS6KA5-F	GGACCTTCAGGAGCTCAAAA
60	RPS6KA5-R	TCCTCACTGTCAAGCACGAG
61	DZIP3-F	TCTTATTCCACTGCTTGCCA
62	DZIP3-R	TGTGCGTCATCCTCTACCTG
63	RNF2-F	TGAGTTCCGTTTGTCTGCAC
64	RNF2-R	TGATACCAGAGTCTTGCTCCG
65	RNF20-F	AGCTTGCGATTTTTGGTTTG
66	RNF20-R	ATTCAGGGACCACAGTGGAA
67	UBE2A-F	TGGATGGAACATCTTAGAGACAAA
68	UBE2A-R	GAAGGGACCCCGTTTGAG
69	UBE2B-F	TGGACTCCATCGATTCTGAAG
70	UBE2B-R	TCCAAATAAACCACCAACTGTTA
71	USP16-F	GGTTCAGATCTTGGCGTCAG
72	USP16-R	AGCCTTCAGTTTGGCTGTGT
73	USP21-F	TAACAGGTGGCTCTCGGGTA
74	USP21-R	GCCTCACTGGGGGACAG
75	MBD2-F	CCTTTGGGTAGTTCCATGGTT
76	MBD2-R	CAACGAATGAATGAACAGCC
77	HDAC1-F	CATCTCCTCAGCATTGGCTT
78	HDAC1-R	CGAATCCGCATGACTCATAA
79	HDAC2-F	ATGAGGCTTCATGGGATGAC
80	HDAC2-R	ATGGCGTACAGTCAAGGAGG
81	HDAC3-F	CTGTGTAACGCGAGCAGAAC
82	HDAC3-R	GCAAGGCTTCACCAAGAGTC
83	HDAC4-F	CTGGTCTCGGCCAGAAAGT
84	HDAC4-R	CGTGGAAATTTTGAGCCATT
85	HDAC5-F	GAACTGGGCATGGCTCTTG
86	HDAC5-R	GGGAACCATCCTTGGAAATC
87	HDAC6-F	GCGGTGGATGGAGAAATAGA
88	HDAC6-R	CCGGAGGGTCCTTATCGTAG
89	HDAC8-F	GCGTGATTTCCAGCACATAA
90	HDAC8-R	ATACTTGACCGGGGTCATCC
91	HDAC9-F	GCCCACAGGAACTTCTGACT
92	HDAC9-R	GAACTCTAAGCCAGATGGGG
93	HDAC10-F	GAACAGCCACATCCAGGG
94	HDAC10-R	CCTCTTAGATGGGATGCTGG
95	HDAC11-F	AAGGAAGTTGGGGAGGAAGA
96	HDAC11-R	GCACACGAGGCGCTATCTTA
97	CIITA-F	CGCTGTTAAGAAGCTCCAGG
98	CIITA-R	GCTGGGTCCTACCTGTCAGA
99	KAT8-F	CCTCATGCTCCTTCTCCAAG
100	KAT8-R	GATCACTCGCAACCAAAAGC
101	KAT7-F	TGATACAGTGGGCATCCTGA
102	KAT7-R	TGAAGTGTCCTACACCAGGC
103	KAT6A-F	ACAGATGGGGATTGGTTCAG
104	KAT6A-R	CGTGGATGGGAAAGAGAGTT
105	KAT6B-F	CATATTGGAATGGGATCAGCA
106	KAT6B-R	AAAGGGGCACCTCAGTATCC
107	EHMT2-F	GAGGTCACCTTTCCCAGTGA
108	EHMT2-R	CCAAACCAGGAAATGGACAG
109	PRMT1-F	CTTCTCACTGCTTTCCGCCT
110	PRMT1-R	GCCGCGAACTGCATCAT
111	PRMT2-F	CGGGCATACAGGATGGACT
112	PRMT2-R	CAGAAGGTGGAGGATGTGGT
113	PRMT3-F	CCGTAGAGAACACGACCCTG
114	PRMT3-R	ACCCTGAAAATCACAAGGACA
115	PRMT5-F	CCTTCTTGGAATTGCTGCAT
116	PRMT5-R	TCTCATGGTTTCCCATCCTC
117	PRMT6-F	AGTTCCGAAGGATACCCAGG
118	PRMT6-R	ACGAGTGCTACTCGGACGTT
119	PRMT7-F	CCGATCAGCTCTGTGTCAAA
120	PRMT7-R	CAACAAGCATTCCACCGAG
121	PRMT8-F	CCGTAGAGAACACGACCCTG
122	PRMT8-R	ACCCTGAAAATCACAAGGACA
123	SETD1A-F	GGTGACTCCTCCGTGGG
124	SETD1A-R	ACCTGTGGAGGTGCCAGT
125	SETD2-F	TTCTGCTGTCTTGGGCTTTT
126	SETD2-R	GAGATGATGCCAGCCTTGAG
127	SETD3-F	GCCCACCTGTAGTCCTCGTA
128	SETD3-R	ACACAGCTCGACAGTACGCC
129	SETD4-F	AATCACTGTGTCCGTGGTGA
130	SETD4-R	CAGGTACAGGAAGAGGGCTG
131	SETD6-F	AGCCATTTGCCCATAAGTGT
132	SETD6-R	CCAATCACAACGCCAATCTA
133	SETD7-F	AGTGTAAACTCCCTGGCCCT
134	SETD7-R	GTTCACGGAGAAAAGAACGG
135	SETD8-F	TCATTCCTTCTTCCTTCCCA
136	SETD8-R	GAAGGAGCTCCAGGAAGAGC
137	SETDB1-F	TTCACGGAGCTTCTGGTCTT
138	SETDB1-R	TTCCCGGCCTACAGAAATAA
139	AURKA-F	GGGCATTTGCCAATTCTGT
140	AURKA-R	TGGAATATGCACCACTTGGA
141	AURKB-F	AGATGGGGTGACAGGCTCTT
142	AURKB-R	AGGAGAACTCCTACCCCTGG
143	AURKC-F	CTCCCCTCAATCATTTCTGG
144	AURKC-R	GATTGCAGATTTTGGCTGGT
145	KDM1A-F	CATCCGGTCATGAGGAAGTC
146	KDM1A-R	CCCCACCTGAGGAAGAAAAT
147	KDM5B-F	TGGATACGTGGCGTAAAATG
148	KDM5B-R	CGAGCAGACTGGCATCTGTA
149	KDM5C-F	CTCCTGCACACTGGTTTGTG
150	KDM5C-R	CTGACCTCCTGCACCAACTT
151	KDM4A-F	AGCTTGCTTAAAGGCTGACG
152	KDM4A-R	GAAGTTTCAGTGAGCGGGAG
153	KDM4C-F	CTTTCCTGCAAGTGCACAAT
154	KDM4C-R	CCATGCTGGTTTTAATCATGG
155	MBD2-F	CCTTTGGGTAGTTCCATGGTT
156	MBD2-R	CAACGAATGAATGAACAGCC
157	HDAC7-F	CCTGCTGTTGTCACCGC
158	HDAC7-R	TCCTCTCCAGCTCAGAGACC
159	NOTCH1-F	GTTGGGGTCCTGGCATC
160	NOTCH1-R	GGTGAGACCTGCCTGAATG
161	NOTCH2-F	CACAGGGTTCATAGCCATCTC
162	NOTCH2-R	GGAGGCGACCGAGAAGAT
163	EZH2-F	CTGATTTTACACGCTTCCGC
164	EZH2-R	GGAACAACGCGAGTCGG
165	SUZ12-F	AAGCTGCAAATGAGCTGACA
166	SUZ12-R	CCAGAACAAACATCAAAAGGA
167	EED-F	TCTTCCATCTTGCCAGGTTT
168	EED-R	ATGTTGATTGTGTGCGATGG
169	EP300-F	TCTGGTAAGTCGTGCTCCAA
170	EP300-R	GCGGCCTAAACTCTCATCTC
171	GAPDH-F	AGAAGGCTGGGGCTCATTTG
172	GAPDH-R	AGGGGCCATCCACAGTCTTC
173	ACTIN-F	AGCGAGCATCCCCCAAAGTT
174	ACTIN-R	GGGCACGAAGGCTCATCATT
175	B2M-F	TGCTGTCTCCATGTTTGATGTATCT
176	B2M-R	TCTCTGCTCCCCACCTCTAAGT
